# Supplementary material
Source: PubMed Central journal article supplement (PMC6941756)
Supplement: NIHMS1060988-supplement-Supplement.pdf [file NIHMS1060988-supplement-Supplement.pdf]

## Supporting Information

# **Molecular determinants of epistasis in HIV-1 protease: Elucidating the interdependence of L89V and L90M mutations in resistance**

Mina Henes<sup>1</sup>, Klajdi Kosovrasti<sup>1</sup>, Gordon J. Lockbaum<sup>1</sup>, Florian Leidner<sup>1</sup>, Gily S. Nachum<sup>1</sup>,  
Ellen A. Nalivaika<sup>1</sup>, Daniel N.A. Bolon<sup>1</sup>, Nese Kurt Yilmaz<sup>1</sup>, Celia A. Schiffer<sup>\*,1</sup>, Troy W.  
Whitfield<sup>\*,2,3</sup>

<sup>1</sup>Department of Biochemistry and Molecular Pharmacology, <sup>2</sup>Department of Medicine, and  
<sup>3</sup>Program in Bioinformatics and Integrative Biology, University of Massachusetts Medical  
School, Worcester, Massachusetts 01605, USA

\*Corresponding Author

Celia A. Schiffer: Phone: +1 508 856 8008; Celia.Schiffer@umassmed.edu

Troy W. Whitfield: Phone: +1 508 856 4401; Troy.Whitfield@umassmed.edu

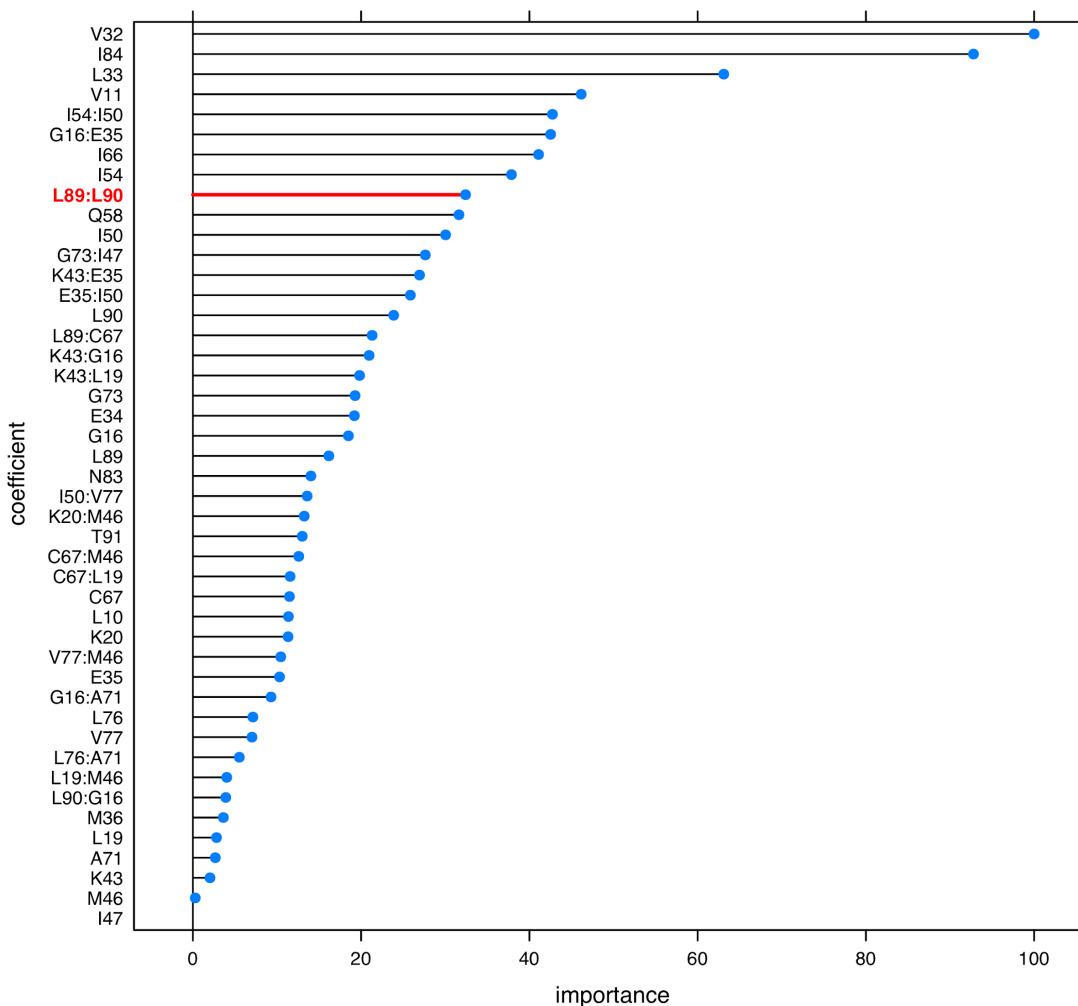

**Figure S1.** Feature importance for a sequence-based linear model of darunavir binding by HIV-1 protease. Curated in vitro susceptibility data ( $IC_{50}$ ) for darunavir<sup>1</sup> were analyzed for detection of pairwise non-additive effects of mutations on susceptibility. In total, 605  $IC_{50}$  measurements were included, each corresponding to a complete HIV-1 protease sequence from patient isolates. The fitted model was of the form  $\log_{10}(IC_{50}) = \beta_0 + \beta_1x_1 + \beta_2x_2 + \dots + \beta_{1,2}x_1x_2 + \dots + \beta_{p-1,p}x_{p-1}x_p$ , where there are  $p$  “main effects” (i.e. mutations occurring at a single residue) and at most  $p(p-1)/2$  interaction terms. The features  $x_i$  are defined as indicator variables for a mutation at site  $i$ , such that  $x_i=0$  for wild-type amino acid at site  $i$  and  $x_i=1$  for any amino acid substitution at that site. Feature selection for this model was done in a two-stage “main effects first” procedure<sup>2</sup>, where a model was first fitted for the main effects (i.e. no interaction terms) by multiple regression under the elastic net penalty<sup>3</sup>,  $\lambda \sum_i (1-\alpha)\beta_i^2/2 + \alpha|\beta|$ , with sparsity enforced by favoring the  $l_1$ -norm penalty, choosing  $\alpha=0.95$ . Next, the interaction terms were selected by fitting the residuals of the main effects model under the elastic net penalty. At each of these stages, feature selection was carried out under 5-fold cross validation. After feature selection, the coefficients,  $\beta_i$ , of the final model were fitted under a relaxed ( $\lambda=0$ ) penalty. The “importance” of these features above is reported as  $|t|/|t|_{\max}$ . The co-occurrence of mutations at residues 89 and 90, highlighted in red above, is an important feature in determining susceptibility to darunavir inhibition.

|           |   |   |    |    |    |    |    |    |    |    |    |    |    |    |    |    |    |    |    |    |   |   |   |   |   |   |   |   |   |   |   |   |   |   |   |   |   |   |   |   |   |   |   |   |   |   |   |   |   |   |   |   |   |   |   |   |   |   |   |   |   |   |   |   |   |   |   |   |   |   |   |   |   |   |   |   |   |   |   |   |   |   |   |   |   |   |   |   |   |   |   |   |   |   |   |   |   |   |
|-----------|---|---|----|----|----|----|----|----|----|----|----|----|----|----|----|----|----|----|----|----|---|---|---|---|---|---|---|---|---|---|---|---|---|---|---|---|---|---|---|---|---|---|---|---|---|---|---|---|---|---|---|---|---|---|---|---|---|---|---|---|---|---|---|---|---|---|---|---|---|---|---|---|---|---|---|---|---|---|---|---|---|---|---|---|---|---|---|---|---|---|---|---|---|---|---|---|---|---|
|           |   | 5 | 10 | 15 | 20 | 25 | 30 | 35 | 40 | 45 | 50 | 55 | 60 | 65 | 70 | 75 | 80 | 85 | 90 | 95 |   |   |   |   |   |   |   |   |   |   |   |   |   |   |   |   |   |   |   |   |   |   |   |   |   |   |   |   |   |   |   |   |   |   |   |   |   |   |   |   |   |   |   |   |   |   |   |   |   |   |   |   |   |   |   |   |   |   |   |   |   |   |   |   |   |   |   |   |   |   |   |   |   |   |   |   |   |   |
| NL4-3     | 1 | P | Q  | I  | T  | L  | W  | Q  | R  | P  | L  | V  | I  | K  | I  | G  | G  | L  | K  | E  | A | L | L | D | T | G | A | D | D | T | V | L | E | E | M | N | L | P | G | R | W | K | P | K | M | I | G | G | I | G | G | F | I | K | V | R | Q | Y | D | Q | I | L | I | E | I | C | G | H | K | A | I | G | T | V | L | V | G | P | T | P | V | N | I | I | G | R | N | L | L | T | Q | I | G | C | T | L | N | F |
| KY        | 1 | P | Q  | I  | T  | L  | W  | Q  | R  | F  | V  | V  | V  | K  | V  | G  | G  | L  | M  | E  | A | L | L | D | T | G | A | D | D | T | I | E | E | M | N | L | P | G | R | W | I | P | K | I | V | G | G | I | G | G | F | M | K | V | R | Q | Y | E | N | V | P | I | E | I | Y | C | K | I | L | S | T | V | L | I | G | P | T | P | A | N | I | I | G | R | N | L | T | Q | I | G | C | T | L | N | F |   |   |   |
| KY (V89L) | 1 | P | Q  | I  | T  | L  | W  | Q  | R  | F  | V  | V  | V  | K  | V  | G  | G  | L  | M  | E  | A | L | L | D | T | G | A | D | D | T | I | E | E | M | N | L | P | G | R | W | I | P | K | I | V | G | G | I | G | G | F | M | K | V | R | Q | Y | E | N | V | P | I | E | I | Y | C | K | I | L | S | T | V | L | I | G | P | T | P | A | N | I | I | G | R | N | L | T | Q | I | G | C | T | L | N | F |   |   |   |
| KY (M90L) | 1 | P | Q  | I  | T  | L  | W  | Q  | R  | F  | V  | V  | V  | K  | V  | G  | G  | L  | M  | E  | A | L | L | D | T | G | A | D | D | T | I | E | E | M | N | L | P | G | R | W | I | P | K | I | V | G | G | I | G | G | F | M | K | V | R | Q | Y | E | N | V | P | I | E | I | Y | C | K | I | L | S | T | V | L | I | G | P | T | P | A | N | I | I | G | R | N | L | T | Q | I | G | C | T | L | N | F |   |   |   |
| KY (DM)   | 1 | P | Q  | I  | T  | L  | W  | Q  | R  | F  | V  | V  | V  | K  | V  | G  | G  | L  | M  | E  | A | L | L | D | T | G | A | D | D | T | I | E | E | M | N | L | P | G | R | W | I | P | K | I | V | G | G | I | G | G | F | M | K | V | R | Q | Y | E | N | V | P | I | E | I | Y | C | K | I | L | S | T | V | L | I | G | P | T | P | A | N | I | I | G | R | N | L | T | Q | I | G | C | T | L | N | F |   |   |   |

**Figure S2.** Sequence alignment of NL4-3 wild-type HIV-1 protease and KY variants. Amino acid substitutions at residues 89 and 90 are highlighted in red.

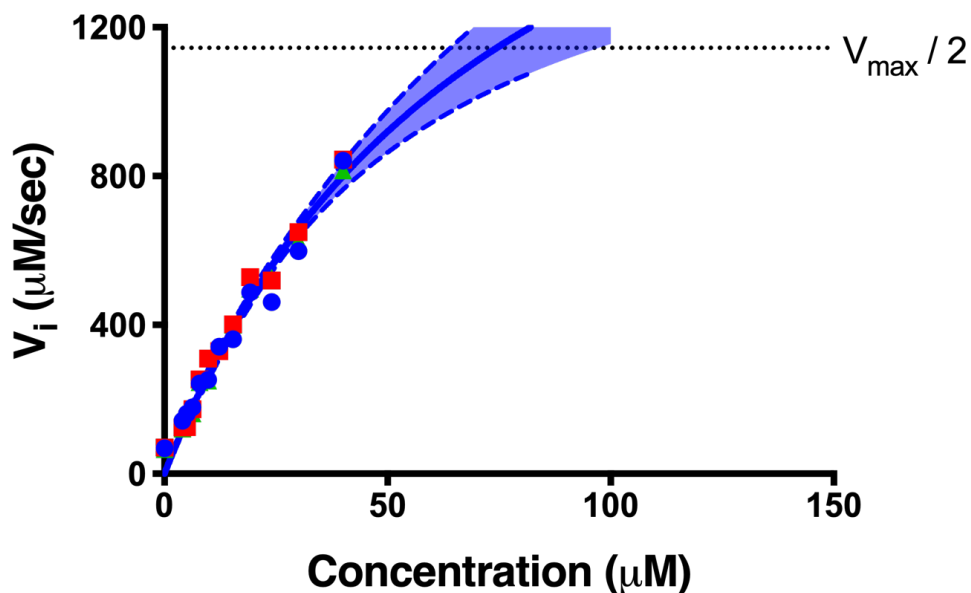

**Figure S3.** Michaelis-Menten plot for the KY variant. Points for three independent replicates, each corrected for the inner-filter effect, are plotted using different colors. After performing a global non-linear fitting to the Michaelis-Menten equation, the resulting best fit is given (solid blue curve), along with 95% confidence intervals (dashed blue curves). The estimated  $K_M$  is  $74.4 \pm 13.4 \mu\text{M}$ .

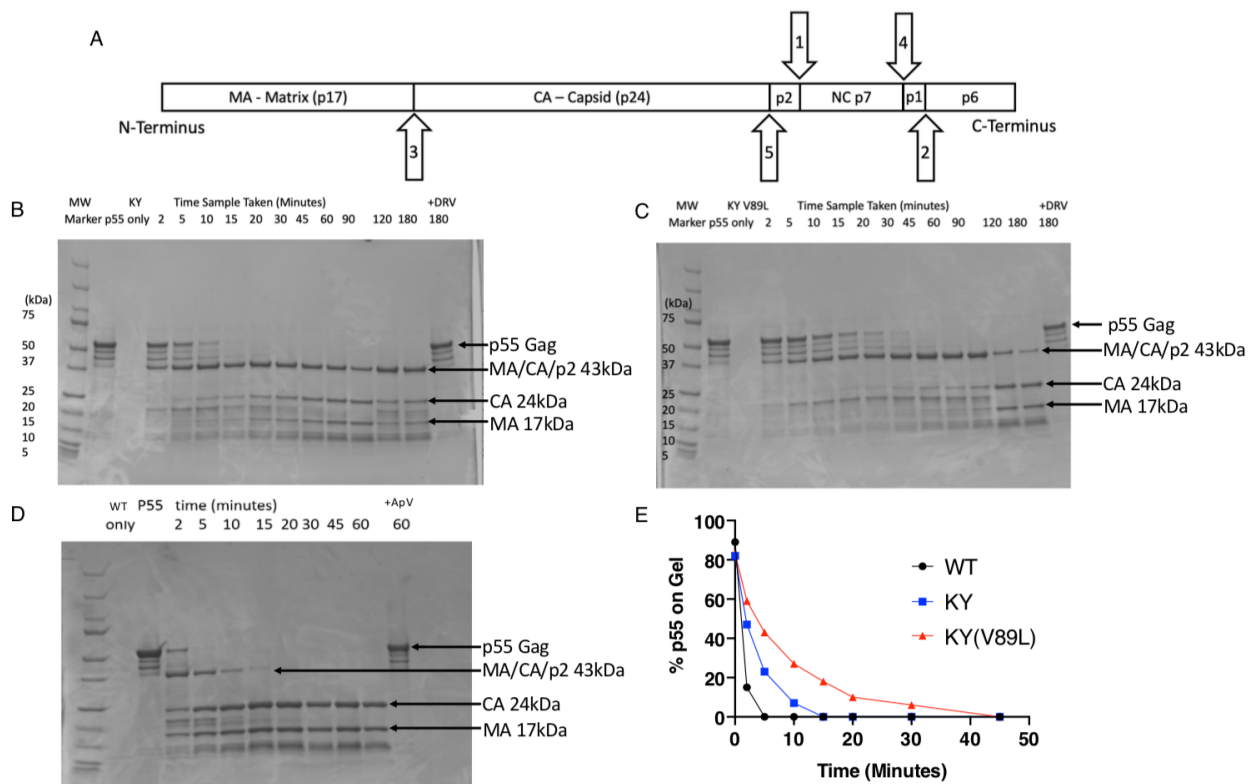

**Figure S4.** (A) Schematic of the p55 Gag polyprotein used in the gel cleavage assays with product sizes noted in kDa. Sites and order of cleavage by WT protease are denoted by arrows<sup>4</sup>. p55 Gag polyprotein cleavage by (B) KY, (C) KY(V89L), and (D) NL4-3 WT. (E) Percent p55 left on the gel reveals that the enzymatic rate of the KY(V89L) variant is approximately 3 times slower compared to KY and approximately 9 times slower than NL4-3 WT. Only the upper band in the p55 lane was used for quantifying the starting amount of p55. Minor bands are impurities.

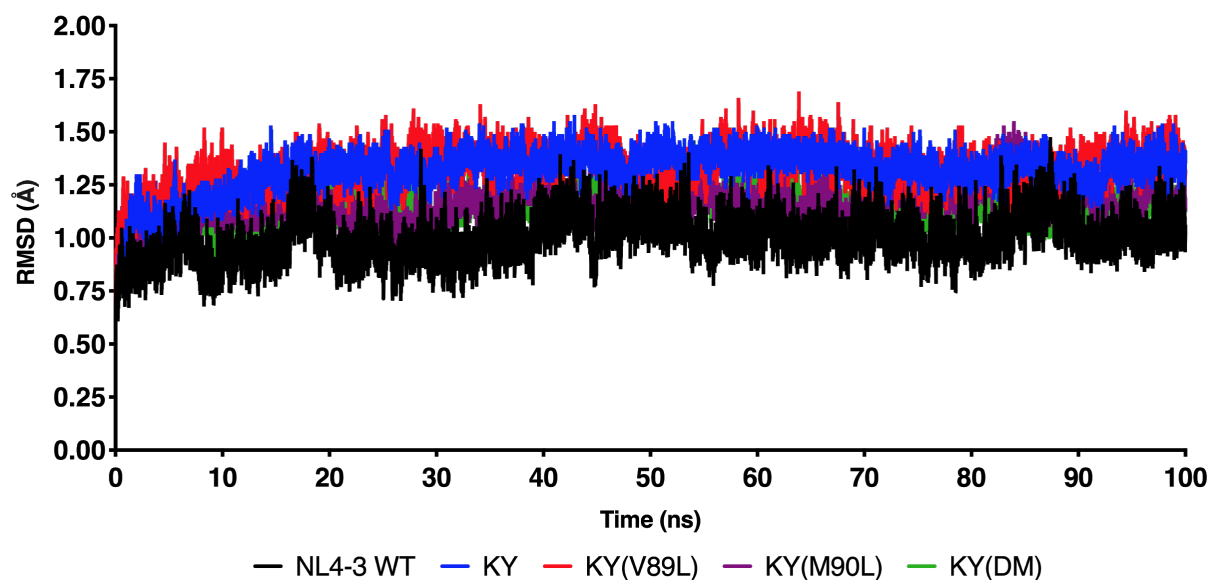

**Figure S5.** Root-mean-square deviation (RMSD) for WT, KY, KY(V89L), KY(M90L), and KY(DM) calculated from 100 ns molecular dynamics simulations.

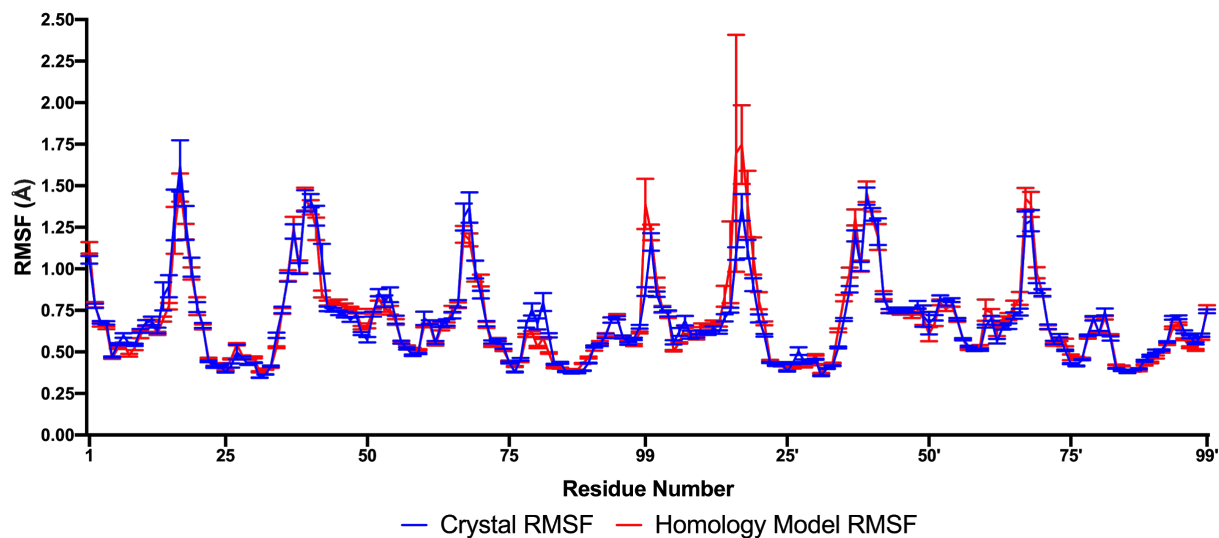

**Figure S6.** Comparing the Root-mean-square fluctuation (RMSF) profile of  $C_{\alpha}$  atoms utilizing a protease variant with 8 mutations relative to NL4-3 WT: I13V, G16E, V32I, L33F, K45I, M46I, V82F, I84V. Three independent 100 ns simulations were carried out starting from a crystal structure (PDB: 6OPV) and a homology model generated using NL4-3 (PDB: 6DGX) as a starting point. The RMSF profiles generated starting from the homology model and from the crystal structure exhibit no significant differences.

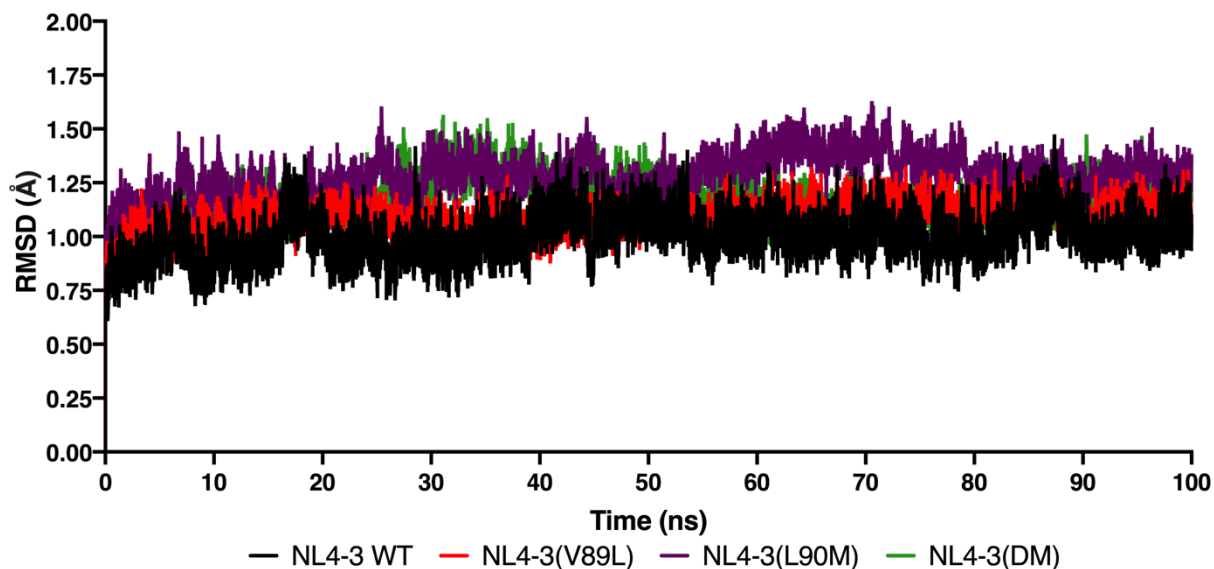

**Figure S7.** Root-mean-square deviation (RMSD) for WT, NL4-3(L89V), NL4-3(L90M), and NL4-3(DM) calculated from 100 ns molecular dynamics simulations



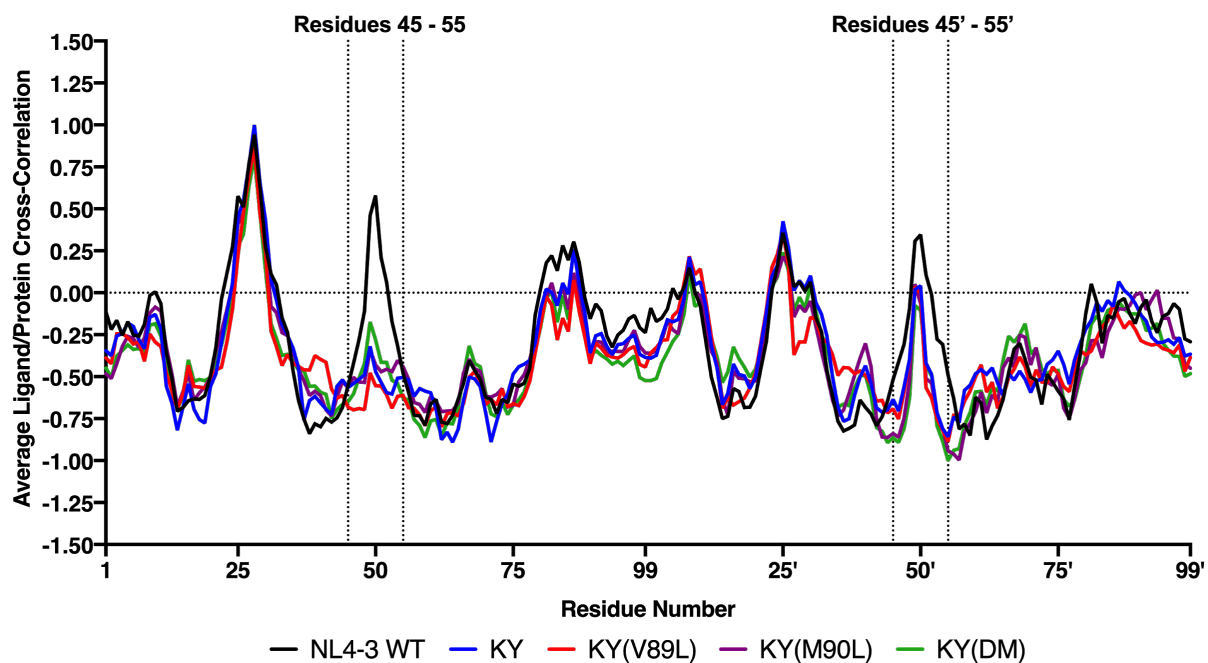

**Figure S10.** Average per-residue cross-correlation for all DRV heavy atoms with the HIV-1 protease  $C_{\alpha}$  atoms.

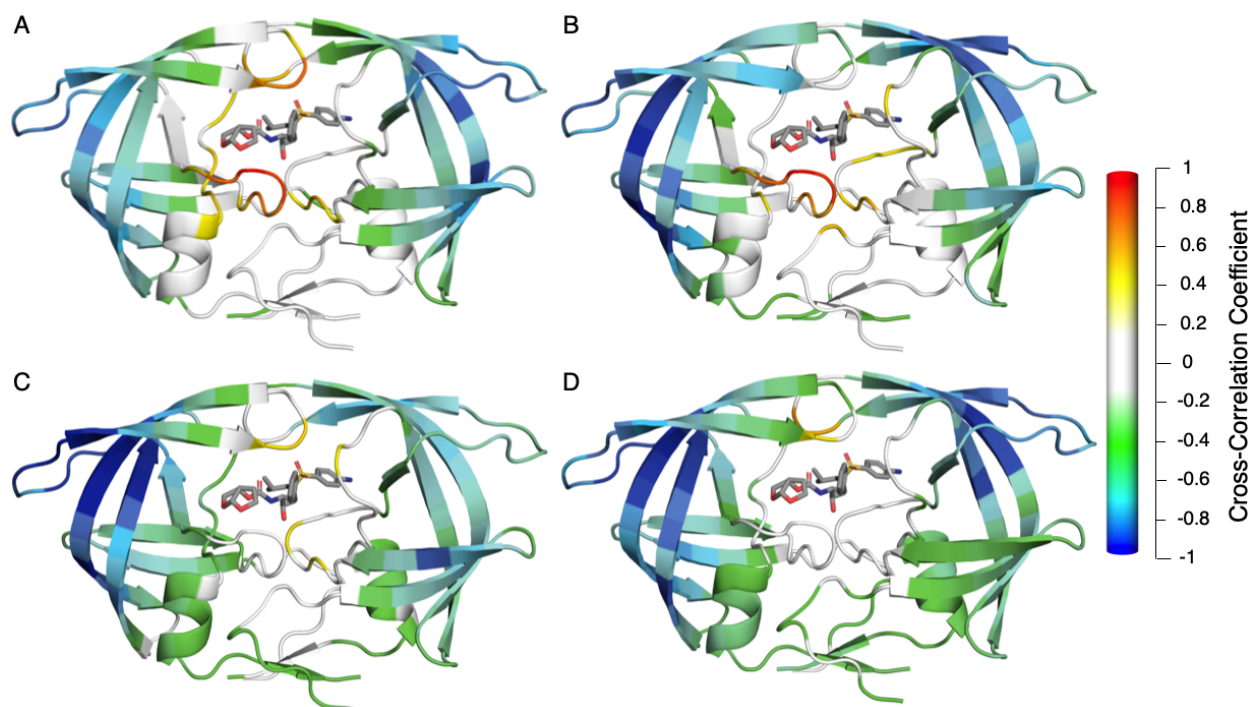

**Figure S11.** Average cross-correlation between fluctuations of  $C_{\alpha}$  atoms and all DRV heavy atoms during the MD simulations. (A) NL4-3, (B) NL4-3(L89V), (C) NL4-3(L90M), and (D) KY(DM).  $C_{\alpha}$  atoms with a Pearson correlation coefficient between -0.2 and 0.2 are colored white.

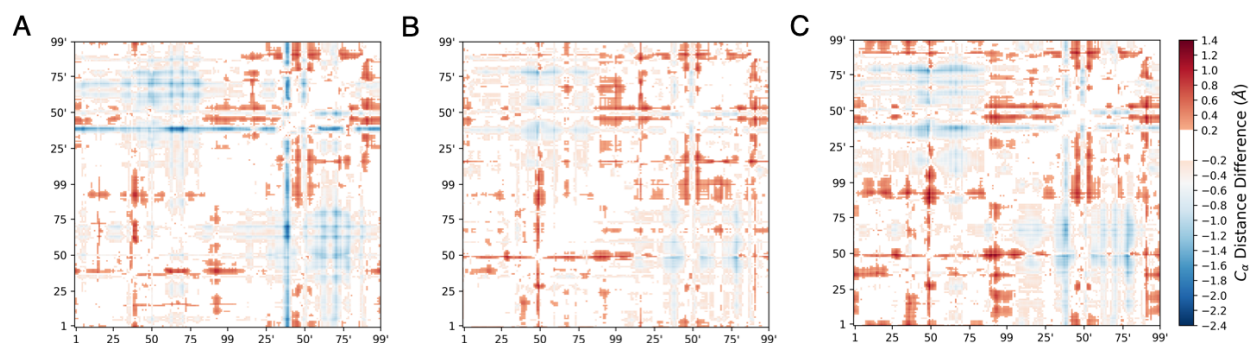

**Figure S12.** Differences in mean intra-protease  $C_{\alpha}$ - $C_{\alpha}$  distance comparing (A) KY minus KY(V89L), (B) KY minus KY(M90L), and (C) KY minus KY(DM). Positive differences indicate that the  $C_{\alpha}$ - $C_{\alpha}$  distance is greater in KY, while negative differences indicate the opposite. In KY(V89L) and KY(DM), bearing the larger leucine side chain, the B chain 70's  $\beta$ -sheet is displaced compared to KY. Unique to the KY(V89L) variant, the B chain flap elbow, 40's loop, is displaced away from the core of the protease and into the solvent.

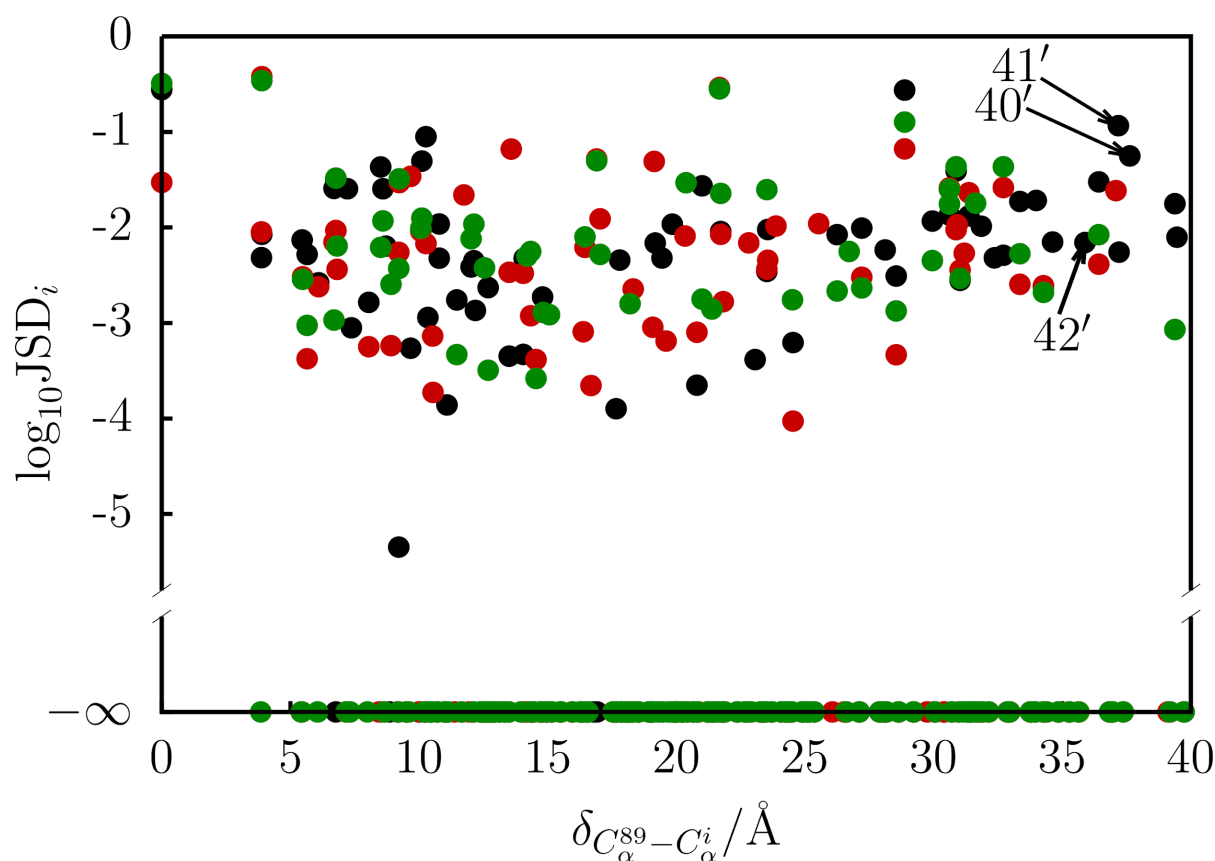

**Figure S13.** Scatter plot showing Jensen-Shannon divergence for each dihedral angle,  $i$ , in the HIV-1 homodimer as a function of approximate distance from the site of mutation (at residues 89, 90 or both). Distances are computed between  $C_{\alpha}$  atoms. The colors of the points correspond to the comparisons: KY versus KY(V89L) (black), KY versus KY(M90L) (red) and KY versus KY(DM) (green). Points along the abscissa are dihedral angles where the Jensen-Shannon divergence signal was not distinguishable from noise. Highlighted residues 40'-42' are in the chain B flap elbow and are different in the KY(V89L) variant compared with the other KY variants.



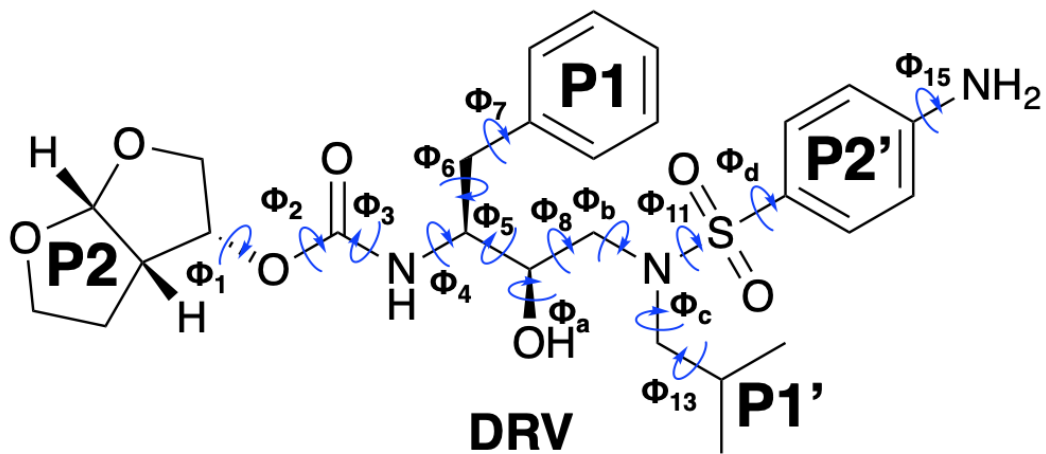

**Figure S14.** 2D structure of DRV with rotatable bonds labeled.

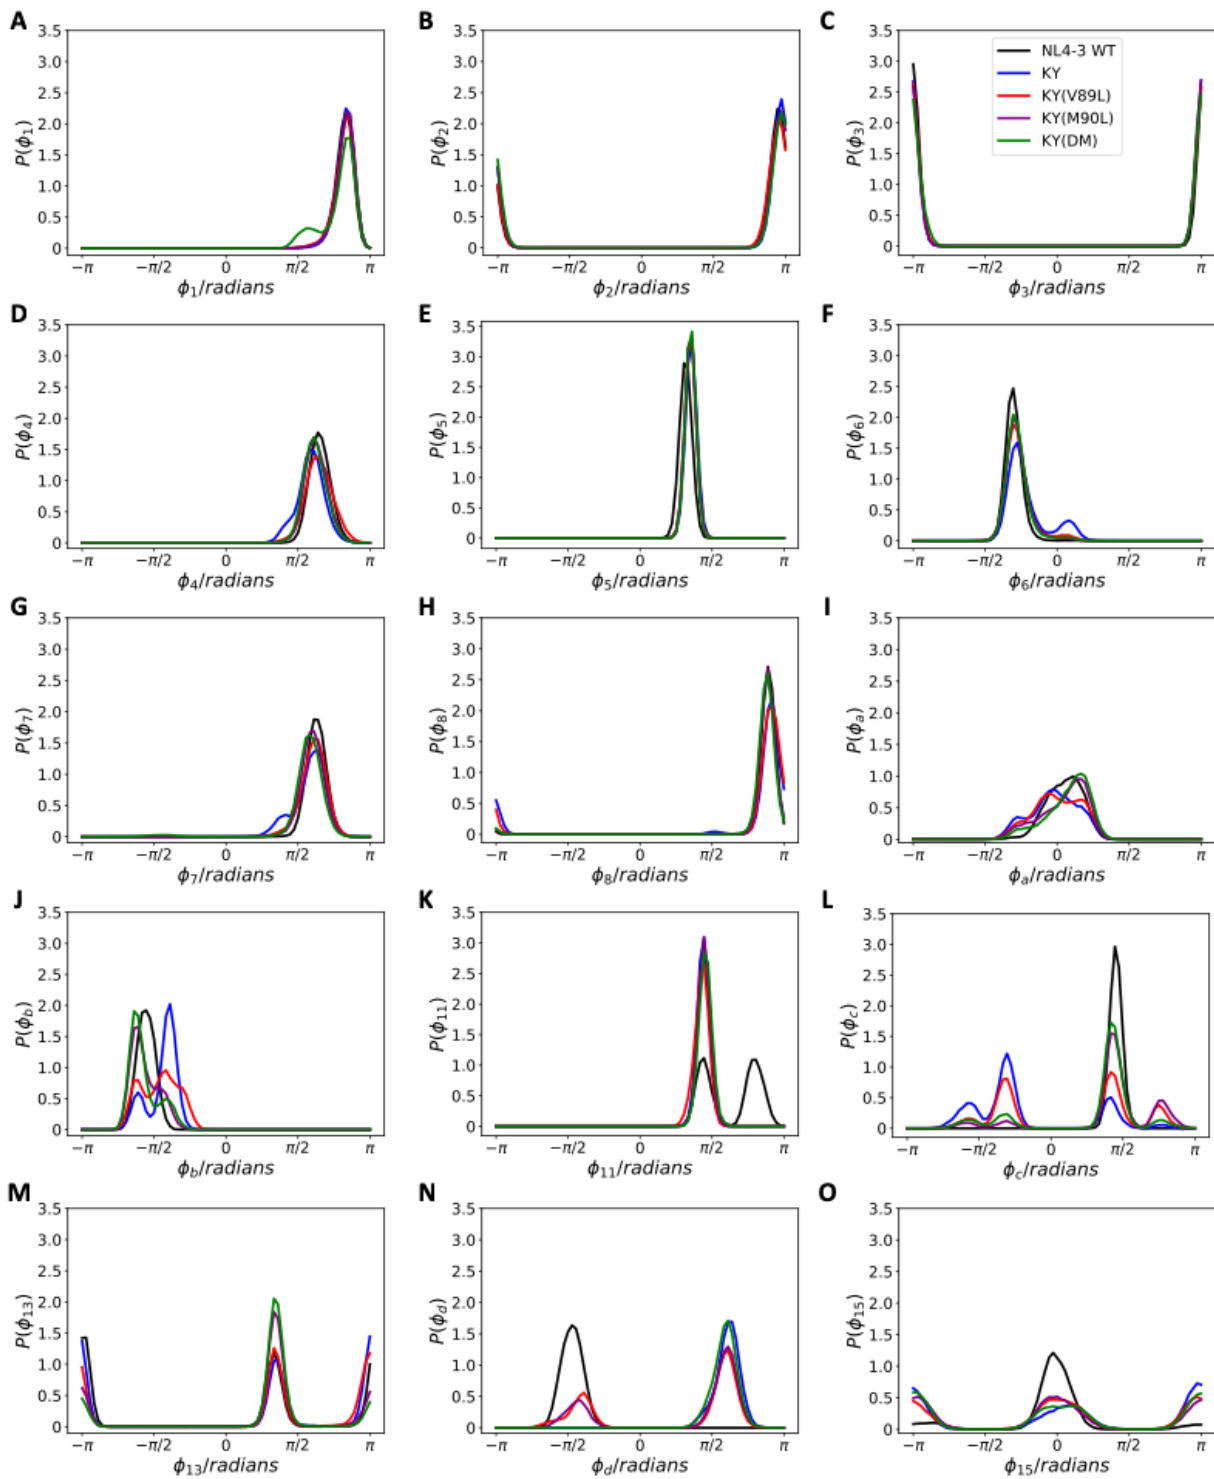

**Figure S15.** Probability distributions collected from molecular dynamics simulations of the 15 DRV rotatable bonds (see **Figure S14** for a definition of dihedral angles).

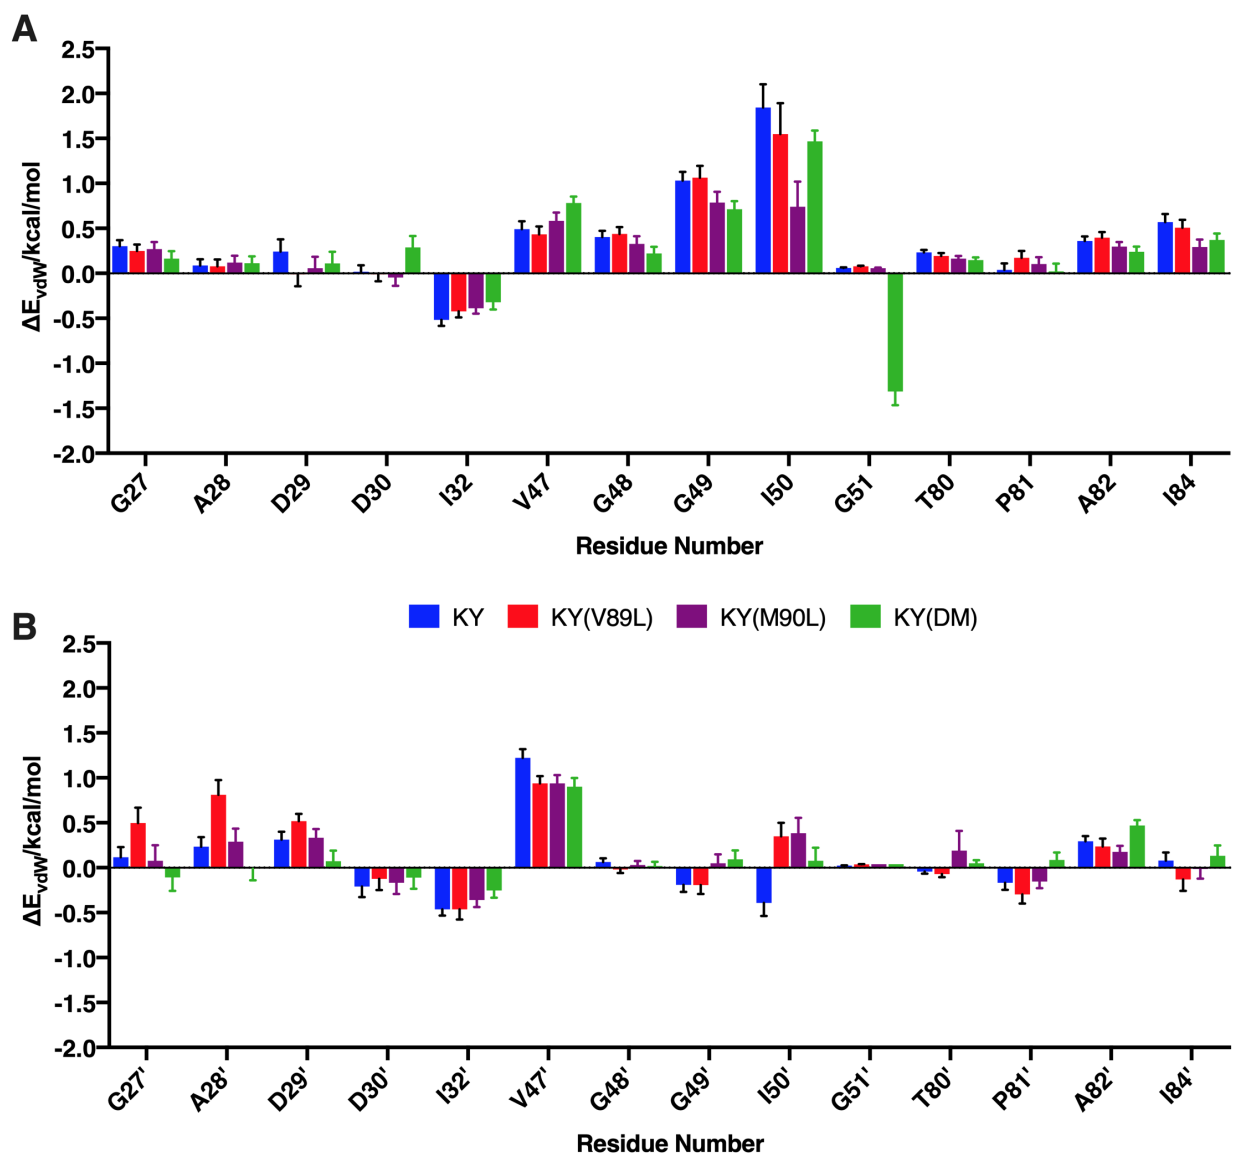

**Figure S16.** Change in darunavir per-residue van der Waals energy ( $\Delta E_{vdW}$ ) relative to NL4-3. (A) Changes in chain A. (B) Changes in chain B. Positive values indicate loss of favorable interactions relative to NL4-3.

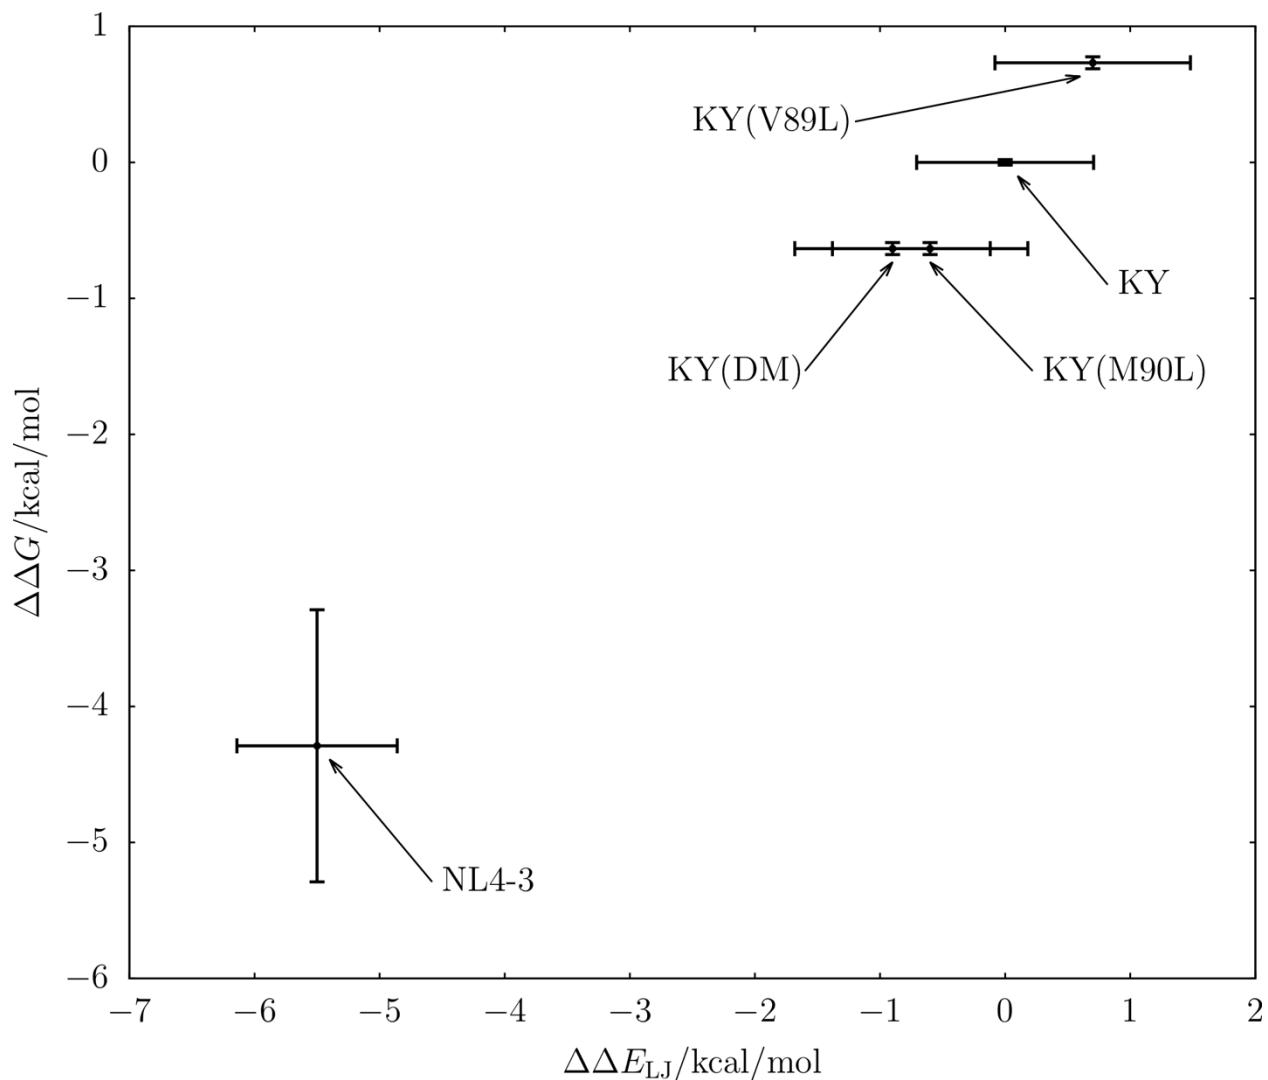

**Figure S17.** Measured changes in DRV binding with different protease variants correspond to changes in computed van der Waals interaction energy (Pearson's  $r=0.99$ ). The reference protease variant above is taken to be KY: for a protease variant  $k$ ,  $\Delta\Delta E_{LJ} = \Delta E_{LJ}^{(k)} - \Delta E_{LJ}^{(KY)}$ .

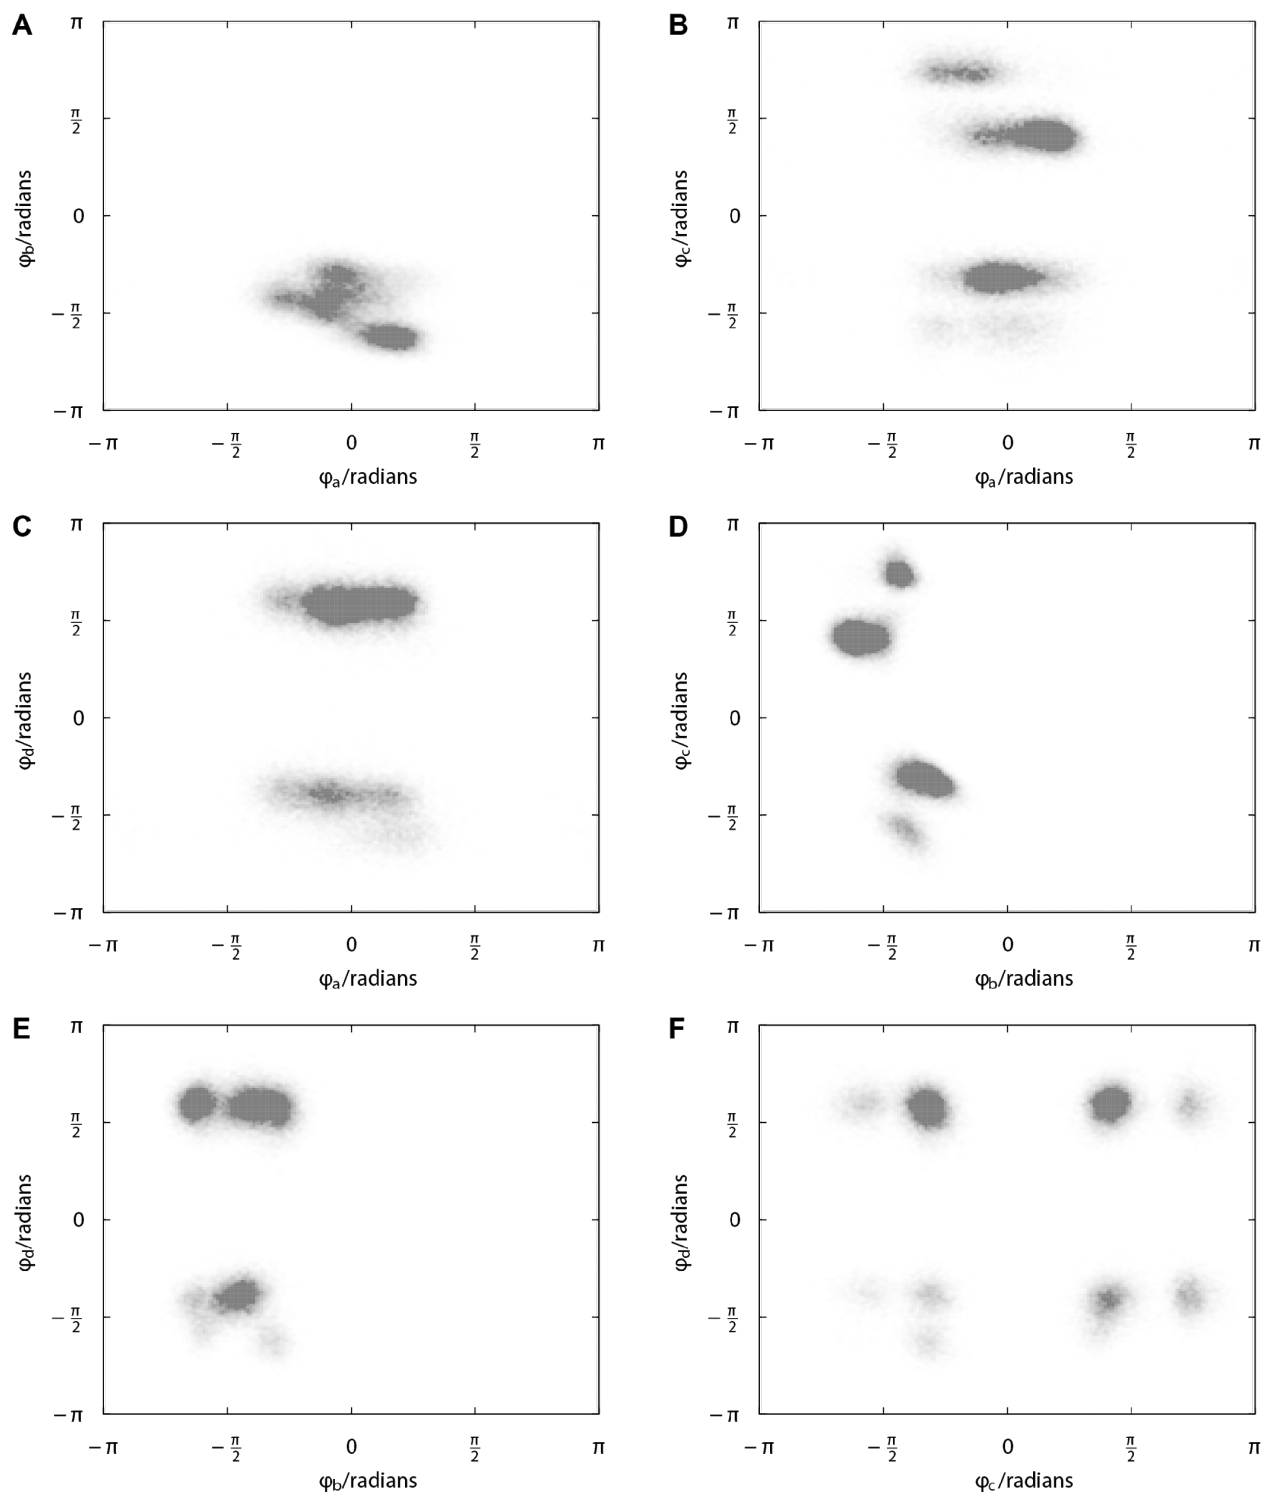

**Figure S18.** In general, sampling among different DRV dihedral angles is coupled. As an example of coupling between the  $\phi_a$ -  $\phi_d$  dihedral angles, joint probability distributions  $P(\phi_i, \phi_j)$  are plotted for the DRV-bound KY(V89L) protease variant. The joint probability distributions plotted are (A)  $P(\phi_a, \phi_b)$ , (B)  $P(\phi_a, \phi_c)$ , (C)  $P(\phi_a, \phi_d)$ , (D)  $P(\phi_b, \phi_c)$ , (E)  $P(\phi_b, \phi_d)$ , (F)  $P(\phi_c, \phi_d)$ .

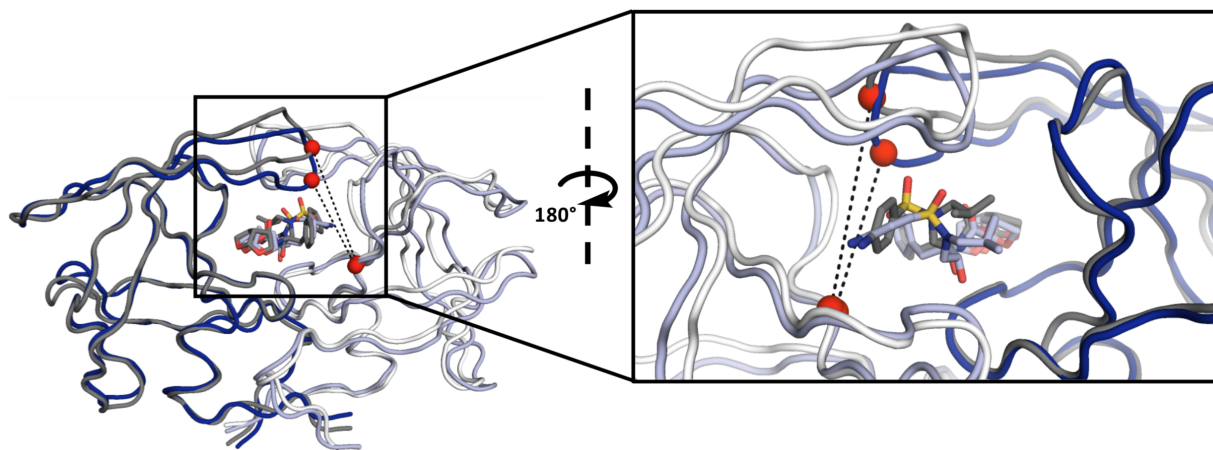

**Figure S19.** The  $\phi_b$  dihedral of DRV is associated with widening of the active site in KYV89L. Two frames from the MD simulations showing the  $\phi_b$  distribution associated with a closer  $C_\alpha^{150} - C_\alpha^{184'}$  distance (shaded blue - chain A is dark blue and chain B is light blue) and the  $\phi_b$  distribution associated with a more open  $C_\alpha^{150} - C_\alpha^{184'}$  distance (shaded gray - chain A is dark gray and chain B is white). The  $C_\alpha$  atoms of I50 and I84' are shown as red spheres. DRV associated with a closer  $C_\alpha^{150} - C_\alpha^{184'}$  distance is shown in light blue while DRV associated with a more open  $C_\alpha^{150} - C_\alpha^{184'}$  distance is shown in gray (B) Opening of chain A flap is associated with DRV sampling a difference conformation compared to a closed state.

**Table S1.** X-Ray Crystallography Statistics

|                  |                                               |                                               |                 |                 |
|------------------|-----------------------------------------------|-----------------------------------------------|-----------------|-----------------|
| PDB ID           | 6DGX                                          | 6OOU                                          | 6OOS            | 6OOT            |
| Protein          | NL4-3                                         | NL4-3(V89L)                                   | NL4-3(L90M)     | NL4-3(DM)       |
| Inhibitor        | DRV                                           | DRV                                           | DRV             | DRV             |
| Resolution (Å)   | 2.00                                          | 2.13                                          | 1.90            | 1.82            |
| Space Group      | P2 <sub>1</sub> 2 <sub>1</sub> 2 <sub>1</sub> | P2 <sub>1</sub> 2 <sub>1</sub> 2 <sub>1</sub> | P2 <sub>1</sub> | P6 <sub>1</sub> |
| a (Å)            | 51.0                                          | 51.3                                          | 51.0            | 62.2            |
| b (Å)            | 58.3                                          | 58.3                                          | 58.0            | 62.2            |
| c (Å)            | 61.9                                          | 62.4                                          | 62.4            | 82.9            |
| Completeness     | 98.1                                          | 95.5                                          | 95.6            | 97.4            |
| Tot. Reflections | 84332                                         | 29727                                         | 104194          | 257556          |
| Uniq. Reflect.   | 12758                                         | 10309                                         | 27535           | 15901           |
| Avg I/Sig        | 31.1                                          | 13.4                                          | 26.1            | 33.6            |
| Redundancy       | 6.6                                           | 2.9                                           | 3.8             | 16.2            |
| R-Merge (%)      | 5.7                                           | 6.9                                           | 5.1             | 10.0            |
| RMSD Bonds*      | 0.003                                         | 0.005                                         | 0.005           | 0.002           |
| RMSD Angles*     | 0.590                                         | 0.649                                         | 0.836           | 0.603           |
| R-Free*          | 22.8                                          | 25.5                                          | 19.8            | 23.5            |
| R-Work*          | 19.2                                          | 20.4                                          | 16.4            | 19.2            |

\*Based on Phenix Program

**Table S2.** Kinetics and binding measurements for the NL4-3 wild-type and variants with the introduction of the following mutations: L89V, L90M, and the L89V, L90M double mutation.  $K_M$  and the turnover number,  $k_{cat}$ , were measured using a natural substrate sequence. The enzyme catalytic efficiency is  $k_{cat}/K_M$ . Mean protease-DRV van der Waals energy,  $\Delta E_{vdw}$ , is reported.

|                                                        | NL4-3                | NL4-3(L89V)        | NL4-3(L90M)         | NL4-3(DM)           |
|--------------------------------------------------------|----------------------|--------------------|---------------------|---------------------|
| $K_M$ ( $\mu\text{M}$ )                                | <b>71.4 ± 6.8</b>    | <b>46.9 ± 4.2</b>  | <b>139.2 ± 18.9</b> | <b>180.3 ± 56.2</b> |
| $k_{cat}$ ( $\text{s}^{-1}$ )                          | <b>1282.7 ± 0.06</b> | <b>13.3 ± 0.6</b>  | <b>5.9 ± 1.1</b>    | <b>108.6 ± 0.03</b> |
| $k_{cat} / K_M$<br>( $\mu\text{M}^{-1}\text{s}^{-1}$ ) | <b>17.1 ± 0.1</b>    | <b>0.3 ± 0.1</b>   | <b>0.04 ± 0.2</b>   | <b>0.6 ± 0.3</b>    |
| $K_i$ (nM)                                             | <b>&lt; 0.005</b>    | <b>&lt; 0.005</b>  | <b>&lt; 0.005</b>   | <b>&lt; 0.005</b>   |
| $\Delta E_{vdw}$<br>(kcal/mol)                         | <b>-58.5 ± 0.4</b>   | <b>-58.1 ± 0.6</b> | <b>-57.5 ± 0.5</b>  | <b>-55.8 ± 0.6</b>  |

**Table S3.** Configurational entropy,  $S_j = -k_B \sum_i P_i(\phi_j) \ln P_i(\phi_j)$ , for each of the selected DRV dihedral angles  $1 \leq j \leq 4$ .  $\phi_a$ ,  $\phi_c$ , and  $\phi_d$  entropy are moderately correlated with DRV binding (Pearson's  $r=0.70, 0.60, 0.64$ , respectively).  $\phi_b$  entropy is strongly correlated with DRV binding (Pearson's  $r=0.87$ ).

|           | <b>NL4-3 WT</b> | <b>KY</b> | <b>KY(V89L)</b> | <b>KY(M90L)</b> | <b>KY(DM)</b> |
|-----------|-----------------|-----------|-----------------|-----------------|---------------|
| $S_a/k_B$ | 3.8             | 4.2       | 4.3             | 4.1             | 4.0           |
| $S_b/k_B$ | 2.7             | 3.2       | 3.8             | 3.3             | 3.3           |
| $S_c/k_B$ | 2.2             | 4.4       | 4.6             | 4.1             | 4.0           |
| $S_d/k_B$ | 3.1             | 3.2       | 4.2             | 4.0             | 3.2           |



## References

1. Rhee, S.-Y.; Taylor, J.; Fessel, W. J.; Kaufman, D.; Towner, W.; Troia, P.; Ruane, P.; Hellinger, J.; Shirvani, V.; Zolopa, A.; Shafer, R. W., HIV-1 protease mutations and protease inhibitor cross-resistance. *Antimicrob Agents Chemother* **2010**, *54* (10), 4253-4261.
2. Efron, B.; Hastie, T.; Johnstone, I.; Tibshirani, R., Least angle regression. *Ann. Statist.* **2004**, *32* (2), 407-499.
3. Zou, H.; Hastie, T., Regularization and Variable Selection via the Elastic Net. *Journal of the Royal Statistical Society. Series B (Statistical Methodology)* **2005**, *67* (2), 301-320.
4. Pettit, S. C.; Henderson, G. J.; Schiffer, C. A.; Swanstrom, R., Replacement of the P1 Amino Acid of Human Immunodeficiency Virus Type 1 Gag Processing Sites Can Inhibit or Enhance the Rate of Cleavage by the Viral Protease. *Journal of Virology* **2002**, *76* (20), 10226-10233.
